# Supplementary material
Source: ML conference proceedings conference paper supplement (https://proceedings.neurips.cc/paper_files/paper/2020/hash/1c336b8080f82bcc2cd2499b4c57261d-Abstract.html)
Supplement: Supplementary file [file 1c336b8080f82bcc2cd2499b4c57261d-Supplemental.pdf]

## A Proof of GP Kernels of ResNets

### A.1 Notation and Main Idea

For a fixed pair of inputs  $x$  and  $\tilde{x}$ , we introduce two matrices for each layer

$$\hat{\Sigma}_\ell(x, \tilde{x}) = \begin{bmatrix} \langle x_\ell, x_\ell \rangle & \langle x_\ell, \tilde{x}_\ell \rangle \\ \langle \tilde{x}_\ell, x_\ell \rangle & \langle \tilde{x}_\ell, \tilde{x}_\ell \rangle \end{bmatrix},$$

and

$$\Sigma_\ell(x, \tilde{x}) = \begin{bmatrix} K_\ell(x, x) & K_\ell(x, \tilde{x}) \\ K_\ell(\tilde{x}, x) & K_\ell(\tilde{x}, \tilde{x}) \end{bmatrix}.$$

$\hat{\Sigma}_\ell(x, \tilde{x})$  is the empirical Gram matrix of the outputs of the  $\ell$ -th layer, while  $\Sigma_\ell(x, \tilde{x})$  is the infinite-width version. Theorem 3 says that with high probability, for each layer  $\ell$ , the difference of these two matrices measured by the entry-wise  $L_\infty$  norm (denoted by  $\|\cdot\|_{\max}$ ) is small.

The idea is to bound how much the  $\ell$ -th layer magnifies the input error to the output. Specifically, if the outputs of  $(\ell - 1)$ -th layer satisfy

$$\left\| \hat{\Sigma}_{\ell-1}(x, \tilde{x}) - \Sigma_{\ell-1}(x, \tilde{x}) \right\|_{\max} \leq \tau,$$

we hope to prove that with high probability over the randomness of  $W_\ell$  and  $V_\ell$ , we have

$$\left\| \hat{\Sigma}_\ell(x, \tilde{x}) - \Sigma_\ell(x, \tilde{x}) \right\|_{\max} \leq \left( 1 + \mathcal{O}\left(\frac{1}{L}\right) \right) \tau.$$

Then the theorem is proved by first showing that w.h.p.  $\left\| \hat{\Sigma}_0(x, \tilde{x}) - \Sigma_0(x, \tilde{x}) \right\|_{\max} \leq (1 + \mathcal{O}(1/L))^{-L} \epsilon$  and then applying the result above for each layer.

### A.2 Lemmas

We introduce the following lemmas. The first lemma shows the boundedness of  $K_\ell(x, \tilde{x})$ .

**Lemma 5.** *For the ResNet defined in Eqn. (5),  $K_\ell(x, x) = (1 + \alpha^2)^\ell$  for all  $x \in \mathbb{S}^{D-1}$ ,  $\ell = 0, 1, \dots, L$ . Also  $K_\ell(x, x)$  is bounded uniformly when  $0.5 \leq \gamma \leq 1$ .*

Recall that  $\phi_{W_\ell}(z) = \sqrt{\frac{2}{m}} \sigma_0(W_\ell z)$ . Since  $W_\ell$  is Gaussian, we know that  $\phi_{W_\ell}(x_{\ell-1})$  and  $\phi_{W_\ell}(\tilde{x}_{\ell-1})$  are both sub-Gaussian random vectors over the randomness of  $W_\ell$ . Then their inner product enjoys sub-exponential property.

**Lemma 6** (Sub-exponential concentration). *With probability at least  $1 - \delta'$  over the randomness of  $W_\ell \sim \mathcal{N}(0, I)$ , when  $m \geq c' \log(6/\delta')$ , the following hold simultaneously*

$$\left| \langle \phi_{W_\ell}(x_{\ell-1}), \phi_{W_\ell}(\tilde{x}_{\ell-1}) \rangle - \psi_\sigma(\hat{\Sigma}_{\ell-1}(x, \tilde{x})) \right| \leq \sqrt{\frac{c' \log(6/\delta')}{m}} \|x_{\ell-1}\| \|\tilde{x}_{\ell-1}\|, \quad (12)$$

$$\left| \|\phi_{W_\ell}(x_{\ell-1})\|^2 - \|x_{\ell-1}\|^2 \right| \leq \sqrt{\frac{c' \log(6/\delta')}{m}} \|x_{\ell-1}\|^2, \quad (13)$$

$$\left| \|\phi_{W_\ell}(\tilde{x}_{\ell-1})\|^2 - \|\tilde{x}_{\ell-1}\|^2 \right| \leq \sqrt{\frac{c' \log(6/\delta')}{m}} \|\tilde{x}_{\ell-1}\|^2. \quad (14)$$

**Lemma 7** (Locally Lipschitzness, based on [28]).  *$\psi_\sigma$  is  $(1 + \frac{1}{\pi}(\frac{\tau}{\mu})^2)$ -Lipschitz w.r.t. max norm in*

$\mathcal{M}_{\mu, r} = \left\{ \begin{bmatrix} a & b \\ b & c \end{bmatrix} \mid a, c \in [\mu - r, \mu + r]; ac - b^2 > 0 \right\}$  for all  $\mu > 0$ ,  $0 < r \leq \mu/2$ . That means, if

(i).  $\|\hat{\Sigma}_{\ell-1}(x, \tilde{x}) - \Sigma_{\ell-1}(x, \tilde{x})\|_{\max} \leq \tau$  and (ii).  $K_{\ell-1}(x, x) = K_{\ell-1}(\tilde{x}, \tilde{x}) = \mu$ , for  $\tau \leq \mu/2$ , we have

$$\left| \psi_\sigma(\hat{\Sigma}_{\ell-1}(x, \tilde{x})) - \psi_\sigma(\Sigma_{\ell-1}(x, \tilde{x})) \right| \leq \left( 1 + \frac{1}{\pi} \left( \frac{\tau}{\mu} \right)^2 \right) \tau.$$

### A.3 Proof of Theorem 3

*Proof.* In this proof, we also show the following hold with the same probability.

1. For  $\ell = 0, 1, \dots, L$ ,  $\|x_\ell\|$  and  $\|\tilde{x}_\ell\|$  are bounded by an absolute constant  $C_1$  ( $C_1 = 4$ ).

2. For  $\ell = 1, \dots, L$ ,  $\|\phi_{W_\ell}(x_{\ell-1})\|$  and  $\|\phi_{W_\ell}(\tilde{x}_{\ell-1})\|$  are bounded by an absolute constant  $C_2$  ( $C_2 = 8$ ).
3.  $\left| \langle \phi_{W_\ell}(x_{\ell-1}^{(1)}), \phi_{W_\ell}(x_{\ell-1}^{(2)}) \rangle - \Gamma_\sigma(K_{\ell-1})(x^{(1)}, x^{(2)}) \right| \leq 2\epsilon$  for all  $\ell = 1, \dots, L$  and  $(x^{(1)}, x^{(2)}) \in \{(x, x), (x, \tilde{x}), (\tilde{x}, \tilde{x})\}$ .

We focus on the  $\ell$ -th layer. Let  $\tau = \left\| \hat{\Sigma}_{\ell-1}(x, \tilde{x}) - \Sigma_{\ell-1}(x, \tilde{x}) \right\|_{\max}$ . Recall that  $\Gamma_\sigma(K_{\ell-1})(x, \tilde{x}) = \psi_\sigma(\Sigma_{\ell-1}(x, \tilde{x})) = \mathbb{E}_{(X, \tilde{X}) \sim \mathcal{N}(0, \Sigma_{\ell-1}(x, \tilde{x}))} \sigma(X) \sigma(\tilde{X})$ . Then

$$K_\ell(x, \tilde{x}) = K_{\ell-1}(x, \tilde{x}) + \alpha^2 \psi_\sigma(\Sigma_{\ell-1}(x, \tilde{x})).$$

Since  $x_\ell = x_{\ell-1} + \frac{\alpha}{\sqrt{m}} V_\ell \phi_{W_\ell}(x_{\ell-1})$ , we have

$$\begin{aligned} \langle x_\ell, \tilde{x}_\ell \rangle &= \langle x_{\ell-1}, \tilde{x}_{\ell-1} \rangle + \frac{\alpha^2}{m} \langle V_\ell \phi_{W_\ell}(x_{\ell-1}), V_\ell \phi_{W_\ell}(\tilde{x}_{\ell-1}) \rangle \\ &\quad + \alpha \frac{1}{\sqrt{m}} (\langle V_\ell \phi_{W_\ell}(x_{\ell-1}), \tilde{x}_{\ell-1} \rangle + \langle V_\ell \phi_{W_\ell}(\tilde{x}_{\ell-1}), x_{\ell-1} \rangle) \\ &= \langle x_{\ell-1}, \tilde{x}_{\ell-1} \rangle + \alpha^2 P + \alpha(Q + R), \end{aligned}$$

where

$$\begin{aligned} P &\equiv \frac{1}{m} \langle V_\ell \phi_{W_\ell}(x_{\ell-1}), V_\ell \phi_{W_\ell}(\tilde{x}_{\ell-1}) \rangle, \\ Q &\equiv \frac{1}{\sqrt{m}} (\langle V_\ell \phi_{W_\ell}(x_{\ell-1}), \tilde{x}_{\ell-1} \rangle), \\ R &\equiv \frac{1}{\sqrt{m}} (\langle V_\ell \phi_{W_\ell}(\tilde{x}_{\ell-1}), x_{\ell-1} \rangle). \end{aligned}$$

Under the randomness of  $V_\ell$ ,  $P$  is sub-exponential, and  $Q$  and  $R$  are Gaussian random variables. Therefore, for a given  $\delta_0$ , if  $m \geq c_0 \log(2/\delta_0)$ , with probability at least  $1 - \delta_0$  over the randomness of  $V_\ell$ , we have

$$\left| P - \langle \phi_{W_\ell}(x_{\ell-1}), \phi_{W_\ell}(\tilde{x}_{\ell-1}) \rangle \right| \leq \|\phi_{W_\ell}(x_{\ell-1})\| \|\phi_{W_\ell}(\tilde{x}_{\ell-1})\| \sqrt{\frac{c_0 \log(2/\delta_0)}{m}}; \quad (15)$$

for a given  $\tilde{\delta}$ , with probability at least  $1 - 2\tilde{\delta}$  over the randomness of  $V_\ell$ , we have

$$|Q| \leq \|\phi_{W_\ell}(x_{\ell-1})\| \|\tilde{x}_{\ell-1}\| \sqrt{\frac{\tilde{c} \log(2/\tilde{\delta})}{m}}, \quad (16)$$

and

$$|R| \leq \|\phi_{W_\ell}(\tilde{x}_{\ell-1})\| \|x_{\ell-1}\| \sqrt{\frac{\tilde{c} \log(2/\tilde{\delta})}{m}}, \quad (17)$$

where  $c_0, \tilde{c} > 0$  are absolute constants.

Using the above result and Lemma 6 and setting  $\delta_0 = \tilde{\delta} = \frac{\delta}{18(L+1)}$ ,  $\delta' = \frac{\delta}{6(L+1)}$ , when  $m \geq C \log(36(L+1)/\delta)$ , we have (15), (16), (17), (12), (13), and (14) hold with probability at least  $1 - \frac{\delta}{3(L+1)}$ .

Recall that  $\tau = \left\| \hat{\Sigma}_{\ell-1}(x, \tilde{x}) - \Sigma_{\ell-1}(x, \tilde{x}) \right\|_{\max}$ . Conditioned on  $\tau < 0.5$ , we have

$$\|x_{\ell-1}\|^2 \leq K_{\ell-1}(x, x) + \tau \leq (1 + \alpha^2)^L + \tau \leq e + \tau.$$

Similarly we can show  $\|\tilde{x}_{\ell-1}\|^2$  is bounded by  $e + \tau$ . By (13) and (14) we have  $\|\phi_{W_\ell}(x_{\ell-1})\|^2 \leq 2\|x_{\ell-1}\|^2$  and  $\|\phi_{W_\ell}(\tilde{x}_{\ell-1})\|^2 \leq 2\|\tilde{x}_{\ell-1}\|^2$ , which are both bounded.

Then

$$\begin{aligned}
& \left| \langle x_\ell, \tilde{x}_\ell \rangle - (\alpha^2 \psi_\sigma(\Sigma_{\ell-1}(x, \tilde{x})) + K_{\ell-1}(x, \tilde{x})) \right| \\
& \leq \tau + \alpha^2 (P - \psi_\sigma(\Sigma_{\ell-1}(x, \tilde{x}))) + \alpha(|Q| + |R|) \\
& \leq \tau + \alpha^2 \left| P - \langle \phi_{W_\ell}(x_{\ell-1}), \phi_{W_\ell}(\tilde{x}_{\ell-1}) \rangle \right| + \alpha \sqrt{\frac{\tilde{c} \log(2/\tilde{\delta})}{m}} (\|\phi_{W_\ell}(\tilde{x}_{\ell-1})\| \|x_{\ell-1}\| + \|\phi_{W_\ell}(x_{\ell-1})\| \|\tilde{x}_{\ell-1}\|) \\
& \quad + \alpha^2 \left| \psi_\sigma(\hat{\Sigma}_{\ell-1}(x, \tilde{x})) - \psi_\sigma(\Sigma_{\ell-1}(x, \tilde{x})) \right| + \alpha^2 \left| \langle \phi_{W_\ell}(x_{\ell-1}), \phi_{W_\ell}(\tilde{x}_{\ell-1}) \rangle - \psi_\sigma(\hat{\Sigma}_{\ell-1}(x, \tilde{x})) \right| \\
& \leq \tau + (\alpha^2 + \alpha) \sqrt{\frac{C_3 \log(36(L+1)/\delta)}{m}} + \alpha^2 \tau \left( 1 + \frac{1}{\pi} \left( \frac{\tau}{K_{\ell-1}(x, x)} \right)^2 \right) \\
& \leq \tau + (\alpha^2 + \alpha) \sqrt{\frac{C_3 \log(36(L+1)/\delta)}{m}} + \alpha^2 \tau \left( 1 + \frac{1}{4\pi} \right).
\end{aligned}$$

When  $\alpha = \frac{1}{L^\gamma}$ ,  $\gamma \in [0.5, 1]$ , we have  $\alpha^2 \leq 1/L$ . Then when

$$m \geq \frac{C_3 L^{2(1-\gamma)} \log(36(L+1)/\delta)}{\tau^2},$$

we have

$$\left| \langle x_\ell, \tilde{x}_\ell \rangle - K_\ell(x, \tilde{x}) \right| \leq \tau + \frac{4}{L} \tau.$$

As a byproduct, we have

$$\begin{aligned}
& \left| \langle \phi_{W_\ell}(x_{\ell-1}), \phi_{W_\ell}(\tilde{x}_{\ell-1}) \rangle - \psi_\sigma(\Sigma_{\ell-1}(x, \tilde{x})) \right| \\
& \leq \sqrt{\frac{C_4 \log(36(L+1)/\delta)}{m}} + \left( 1 + \frac{1}{\pi} \left( \frac{\tau}{\mu} \right)^2 \right) \tau \leq 2\tau.
\end{aligned}$$

Repeat the above for  $(x_{\ell-1}, x_{\ell-1})$  and  $(\tilde{x}_{\ell-1}, \tilde{x}_{\ell-1})$ , we have with probability at least  $1 - \delta/(L+1)$  over the randomness of  $V_\ell$  and  $W_\ell$ ,

$$\begin{aligned}
& \left\| \hat{\Sigma}_{\ell-1}(x, \tilde{x}) - \Sigma_{\ell-1}(x, \tilde{x}) \right\|_{\max} \leq \tau \Rightarrow \\
& \left\| \hat{\Sigma}_\ell(x, \tilde{x}) - \Sigma_\ell(x, \tilde{x}) \right\|_{\max} \leq (1 + 4/L)\tau.
\end{aligned} \tag{18}$$

Finally, when  $m \geq \frac{C_5 \log(6(L+1)/\delta)}{(\epsilon/e^4)^2}$ , with probability at least  $1 - \delta/(L+1)$  over the randomness of  $A$ , we have

$$\left\| \hat{\Sigma}_0(x, \tilde{x}) - \Sigma_0(x, \tilde{x}) \right\|_{\max} \leq \epsilon/e^4.$$

Then the result follows by successively using (18).  $\square$

#### A.4 proof of lemma 7

*Proof.* [28] showed that

$$\left\| \nabla \psi_\sigma \begin{bmatrix} a & b \\ b & c \end{bmatrix} \right\|_1 = \frac{1}{2} \frac{a+c}{\sqrt{ac}} \left| \hat{\sigma} \left( \frac{b}{\sqrt{ac}} \right) - \frac{b}{\sqrt{ac}} \hat{\sigma}' \left( \frac{b}{\sqrt{ac}} \right) \right| + \hat{\sigma}' \left( \frac{b}{\sqrt{ac}} \right).$$

When  $a, c \in [\mu - r, \mu + r]$ , we have

$$\frac{1}{2} \frac{a+c}{\sqrt{ac}} = \frac{1}{2} \left( \sqrt{\frac{a}{c}} + \sqrt{\frac{c}{a}} \right) \leq \frac{1}{2} \left( \sqrt{\frac{\mu+r}{\mu-r}} + \sqrt{\frac{\mu-r}{\mu+r}} \right) = \left( 1 - \left( \frac{r}{\mu} \right)^2 \right)^{-1/2} \leq 1 + \left( \frac{r}{\mu} \right)^2.$$

The last inequality holds when  $r < \frac{\mu}{2}$ .

Define  $\rho = \frac{b}{\sqrt{ac}}$ , we have  $\rho \in [-1, 1]$ . Then

$$\begin{aligned}
\|\nabla \phi_\sigma\|_1 & \leq \left( 1 + \left( \frac{r}{\mu} \right)^2 \right) \left| \hat{\sigma}(\rho) - \rho \hat{\sigma}'(\rho) \right| + \hat{\sigma}'(\rho) \\
& = \left( 1 + \left( \frac{r}{\mu} \right)^2 \right) \left| \frac{\sqrt{1-\rho^2}}{\pi} \right| + 1 - \frac{\cos^{-1} \rho}{\pi} \\
& \leq \frac{\sqrt{1-\rho^2}}{\pi} + 1 - \frac{\cos^{-1} \rho}{\pi} + \frac{1}{\pi} \left( \frac{r}{\mu} \right)^2 \\
& \leq 1 + \frac{1}{\pi} \left( \frac{r}{\mu} \right)^2.
\end{aligned}$$

$\square$

## B Proof of Theorem 4

### B.1 Notation and Main Idea

We already know that when the network width  $m$  is large enough,  $\langle x_{\ell-1}, \tilde{x}_{\ell-1} \rangle \approx K_{\ell-1}(x, \tilde{x})$ , and  $\langle \phi_{W_\ell}(x_{\ell-1}), \phi_{W_\ell}(\tilde{x}_{\ell-1}) \rangle \approx \Gamma_\sigma(K_{\ell-1})(x, \tilde{x})$ .

Next we need to show the concentration of the inner product of  $\frac{b_\ell}{\sqrt{m}}$  and  $\frac{\tilde{b}_\ell}{\sqrt{m}}$ . We define two matrices for each layer

$$\hat{\Theta}_\ell(x, \tilde{x}) = \frac{1}{m} \begin{bmatrix} \langle b_\ell, b_\ell \rangle & \langle b_\ell, \tilde{b}_\ell \rangle \\ \langle \tilde{b}_\ell, b_\ell \rangle & \langle \tilde{b}_\ell, \tilde{b}_\ell \rangle \end{bmatrix},$$

and

$$\Theta_\ell(x, \tilde{x}) = \begin{bmatrix} B_\ell(x, x) & B_\ell(x, \tilde{x}) \\ B_\ell(\tilde{x}, x) & B_\ell(\tilde{x}, \tilde{x}) \end{bmatrix}.$$

Recall that

$$b_\ell = \alpha \sqrt{\frac{1}{m}} \sqrt{\frac{2}{m}} W_\ell^\top D_\ell V_\ell^\top b_{\ell+1} + b_{\ell+1}.$$

We aim to show that when  $\|\hat{\Theta}_{\ell+1}(x, \tilde{x}) - \Theta_{\ell+1}(x, \tilde{x})\|_{\max} \leq \tau$ , with high probability over the randomness of  $W_\ell$  and  $V_\ell$ , we have  $\|\hat{\Theta}_\ell(x, \tilde{x}) - \Theta_\ell(x, \tilde{x})\|_{\max} \leq (1 + \mathcal{O}(1/L))\tau$ . Notice that  $b_{\ell+1}$  and  $\tilde{b}_{\ell+1}$  contain the information of  $W_\ell$  and  $V_\ell$ ; they are not independent. Nevertheless we can decompose the randomness of  $W_\ell$  and  $V_\ell$  to show the concentration. This technique is also used in [22].

### B.2 Lemmas

In this part we introduce some useful lemmas. The first one shows the property of the step activation function.

**Lemma 8** (Property of  $\sigma'$ ). [22]

(1). *Sub-Gaussian concentration.* With probability at least  $1 - \delta$  over the randomness of  $W_\ell$ , we have

$$\left| \frac{2}{m} \text{Tr}(D_\ell \tilde{D}_\ell) - \psi_{\sigma'}(\hat{\Sigma}_{\ell-1}(x, \tilde{x})) \right| \leq \sqrt{\frac{c \log(2/\delta)}{m}}.$$

(2). *Holder continuity.* Fix  $\mu > 0, 0 < r \leq \mu$ . For all  $A, B \in \mathcal{M}_{\mu, r} = \left\{ \begin{bmatrix} a & b \\ b & c \end{bmatrix} \mid a, c \in [\mu - r, \mu + r]; ac - b^2 > 0 \right\}$ , if  $\|A - B\|_{\max} \leq (\mu - r)\epsilon^2$ , then

$$|\psi_{\sigma'}(A) - \psi_{\sigma'}(B)| \leq \epsilon.$$

The following lemma shows that regardless the fact that  $b_{\ell+1}$  and  $\tilde{b}_{\ell+1}$  depend on  $V_\ell$ , we can treat  $V_\ell$  as a Gaussian matrix independent of  $b_{\ell+1}$  and  $\tilde{b}_{\ell+1}$  when the network width is large enough.

**Lemma 9.** Assume the following inequality hold simultaneously for all  $\ell = 1, 2, \dots, L$

$$\left\| \frac{1}{\sqrt{m}} W_\ell \right\| \leq C, \quad \left\| \frac{1}{\sqrt{m}} V_\ell \right\| \leq C.$$

Fix an  $\ell$ . Further assume that

$$\|\hat{\Theta}_{\ell+1}(x, \tilde{x}) - \Theta_{\ell+1}(x, \tilde{x})\|_{\max} \leq 1.$$

When  $m \geq \max\left\{ \frac{C}{\epsilon^2} (1 + \log \frac{6}{\delta}), \frac{C}{\epsilon^2} \log \frac{8L}{\delta'}, cL^{2-2\gamma} \log \frac{8L}{\delta'} \right\}$ , the following holds for all  $(x^{(1)}, x^{(2)}) \in \{(x, x), (x, \tilde{x}), (\tilde{x}, \tilde{x})\}$  with probability at least  $1 - \delta - \delta'$

$$\left| \frac{2}{m} \frac{b_{\ell+1}^{(1)}}{\sqrt{m}}^\top V_\ell D_\ell^{(1)} D_\ell^{(2)} V_\ell^\top \frac{b_{\ell+1}^{(2)}}{\sqrt{m}} - \left\langle \frac{b_{\ell+1}^{(1)}}{\sqrt{m}}, \frac{b_{\ell+1}^{(2)}}{\sqrt{m}} \right\rangle \frac{2}{m} \text{Tr}(D_\ell^{(1)} D_\ell^{(2)}) \right| \leq \epsilon.$$

The following lemma shows the same thing for  $W_\ell$  as  $V_\ell$  in Lemma 9.

**Lemma 10.** Assume the conditions and the results of Lemma 9 hold.

(1). When  $m \geq \max\left\{ \frac{C}{\epsilon^2} (1 + \log \frac{6}{\delta}), \frac{C}{\epsilon^2} \log \frac{8L}{\delta'}, cL^{2-2\gamma} \log \frac{8L}{\delta'} \right\}$ , the following holds for all  $(x^{(1)}, x^{(2)}) \in \{(x, x), (x, \tilde{x}), (\tilde{x}, \tilde{x})\}$  with probability at least  $1 - \delta - \delta'$

$$\left| \frac{1}{m} \frac{2}{m} \left\langle W_\ell^\top D_\ell^{(1)} V_\ell^\top \frac{b_{\ell+1}^{(1)}}{\sqrt{m}}, W_\ell^\top D_\ell^{(2)} V_\ell^\top \frac{b_{\ell+1}^{(2)}}{\sqrt{m}} \right\rangle - \frac{2}{m} \left\langle D_\ell^{(1)} V_\ell^\top \frac{b_{\ell+1}^{(1)}}{\sqrt{m}}, D_\ell^{(2)} V_\ell^\top \frac{b_{\ell+1}^{(2)}}{\sqrt{m}} \right\rangle \right| \leq \epsilon.$$

(2). When  $m \geq \max\{\frac{C}{\tilde{\epsilon}^2} \log \frac{16L}{\delta}, cL^{2-2\gamma} \log \frac{16L}{\delta}\}$ , for all  $(x^{(1)}, x^{(2)}) \in \{(x, x), (x, \tilde{x}), (\tilde{x}, x), (\tilde{x}, \tilde{x})\}$ , the following holds with probability at least  $1 - \tilde{\delta}$

$$\left| \frac{1}{m} \sqrt{\frac{1}{m}} \sqrt{\frac{2}{m}} \langle W_\ell^\top D_\ell^{(1)} V_\ell^\top b_{\ell+1}^{(1)}, b_{\ell+1}^{(2)} \rangle \right| \leq \tilde{\epsilon}.$$

### B.3 Proof of Theorem 4

*Proof.* In this proof we are going to prove that when  $m$  satisfies the assumption, with probability at least  $1 - \delta_0$ , the following hold for  $\ell = 1, \dots, L$ .

$$\begin{aligned} \left| \frac{1}{\alpha^2} \langle \nabla_{V_\ell} f, \nabla_{V_\ell} \tilde{f} \rangle - B_{\ell+1}(x, \tilde{x}) \Gamma_\sigma(K_{\ell-1})(x, \tilde{x}) \right| &\leq \epsilon_0, \\ \left| \frac{1}{\alpha^2} \langle \nabla_{W_\ell} f, \nabla_{W_\ell} \tilde{f} \rangle - K_{\ell-1}(x, \tilde{x}) B_{\ell+1}(x, \tilde{x}) \Gamma_{\sigma'}(K_{\ell-1})(x, \tilde{x}) \right| &\leq \epsilon_0. \end{aligned}$$

We break the proof into several steps. Each step is based on the result of the previous steps. Note that the absolute constants  $c$  and  $C$  may vary throughout the proof.

#### Step 1. Norm Control of the Gaussian Matrices

With probability at least  $1 - \delta_1$ , when  $m > c \log \frac{4L}{\delta_1}$ , one can show that the following hold simultaneously for all  $\ell = 1, 2, \dots, L$  [38]

$$\left\| \frac{1}{\sqrt{m}} W_\ell \right\| \leq C, \quad \left\| \frac{1}{\sqrt{m}} V_\ell \right\| \leq C.$$

#### Step 2. Concentration of the GP kernels

By Theorem 3, with probability at least  $1 - \delta_2$ , when

$$m \geq \frac{C}{\epsilon_2^4} L^{2-2\gamma} \log \frac{36(L+1)}{\delta_2},$$

we have

1. For  $\ell = 0, \dots, L$ ,  $\left\| \Sigma_\ell(x, \tilde{x}) - \hat{\Sigma}_\ell(x, \tilde{x}) \right\|_{\max} \leq c\epsilon_2^2$ ;
2. For  $\ell = 0, 1, \dots, L$ ,  $\|x_\ell\|$  and  $\|\tilde{x}_\ell\|$  are bounded by an absolute constant  $C_1$  ( $C_1 = 4$ );
3. For  $\ell = 1, \dots, L$ ,  $\|\phi_{W_\ell}(x_{\ell-1})\|$  and  $\|\phi_{W_\ell}(\tilde{x}_{\ell-1})\|$  are bounded by an absolute constant  $C_2$  ( $C_2 = 8$ );
4.  $\left| \langle \phi_{W_\ell}(x_{\ell-1}^{(1)}), \phi_{W_\ell}(x_{\ell-1}^{(2)}) \rangle - \Gamma_\sigma(K_{\ell-1})(x^{(1)}, x^{(2)}) \right| \leq 2c\epsilon_2^2$  for all  $\ell = 1, \dots, L$  and  $(x^{(1)}, x^{(2)}) \in \{(x, x), (x, \tilde{x}), (\tilde{x}, \tilde{x})\}$ .

#### Step 3. Concentration of $\sigma'$

By Lemma 8, when  $m \geq \frac{C}{\epsilon_2^2} \log \frac{6L}{\delta_3}$ , with probability at least  $1 - \delta_3$ , for all  $\ell = 1, 2, \dots, L$  and  $(x^{(1)}, x^{(2)}) \in \{(x, x), (x, \tilde{x}), (\tilde{x}, \tilde{x})\}$ , we have

$$\left| \frac{2}{m} \text{Tr}(D_\ell^{(1)} D_\ell^{(2)}) - \Gamma_{\sigma'}(K_{\ell-1})(x^{(1)}, x^{(2)}) \right| \leq \sqrt{\frac{c \log(6L/\delta_3)}{m}} + \sqrt{2 \left\| \hat{\Sigma}_{\ell-1}(x, \tilde{x}) - \Sigma_{\ell-1}(x, \tilde{x}) \right\|_{\max}} \leq \epsilon_2.$$

#### Step 4. Concentration of $B_\ell$

Recall that

$$b_{\ell+1} = \left( v^\top \frac{\partial x_L}{\partial x_{L-1}} \frac{\partial x_{L-1}}{\partial x_{L-2}} \dots \frac{\partial x_{\ell+1}}{\partial x_\ell} \right)^\top.$$

We have

$$b_{L+1} = v,$$

and for  $\ell = 1, 2, \dots, L-1$ ,

$$b_{\ell+1} = \frac{\partial x_{\ell+1}}{\partial x_\ell}^\top b_{\ell+2} = \alpha \sqrt{\frac{1}{m}} \sqrt{\frac{2}{m}} W_{\ell+1}^\top D_{\ell+1} V_{\ell+1}^\top b_{\ell+2} + b_{\ell+2}.$$

Following the same idea in Thm 3, we prove by induction. First of all, for  $b_{L+1}$ , we have  $\Theta_{L+1}(x, \tilde{x}) = \begin{bmatrix} 1 & 1 \\ 1 & 1 \end{bmatrix}$ ,  $\hat{\Theta}_{L+1}(x, \tilde{x}) = \frac{\|v\|^2}{m} \begin{bmatrix} 1 & 1 \\ 1 & 1 \end{bmatrix}$ . Then by Bernstein inequality [39], with probability at least  $1 - \frac{\delta_4}{L}$ , when  $m \geq \frac{C}{\epsilon_4} \log \frac{2L}{\delta_4}$ , we have

$$\left| \frac{\|v\|^2}{m} - 1 \right| \leq \epsilon_4.$$

Fix  $\ell \in \{2, 3, \dots, L\}$ . Assume that

$$\left\| \hat{\Theta}_{\ell+1}(x, \tilde{x}) - \Theta_{\ell+1}(x, \tilde{x}) \right\|_{\max} \leq \tau \leq 1,$$

we hope to prove with high probability,

$$\left\| \hat{\Theta}_\ell(x, \tilde{x}) - \Theta_\ell(x, \tilde{x}) \right\|_{\max} \leq (1 + \mathcal{O}(1/L))\tau.$$

First write

$$\frac{1}{m} \langle b_\ell^{(1)}, b_\ell^{(2)} \rangle = \frac{1}{m} \langle b_{\ell+1}^{(1)}, b_{\ell+1}^{(2)} \rangle + \alpha^2 P + \alpha(Q + R),$$

where

$$\begin{aligned} P &= \frac{1}{m} \frac{2}{m} \langle W_\ell^\top D_\ell^{(1)} V_\ell^\top \frac{b_{\ell+1}^{(1)}}{\sqrt{m}}, W_\ell^\top D_\ell^{(2)} V_\ell^\top \frac{b_{\ell+1}^{(2)}}{\sqrt{m}} \rangle, \\ Q &= \frac{1}{m} \sqrt{\frac{1}{m}} \sqrt{\frac{2}{m}} \langle W_\ell^\top D_\ell^{(1)} V_\ell^\top b_{\ell+1}^{(1)}, b_{\ell+1}^{(2)} \rangle, \\ R &= \frac{1}{m} \sqrt{\frac{1}{m}} \sqrt{\frac{2}{m}} \langle W_\ell^\top D_\ell^{(2)} V_\ell^\top b_{\ell+1}^{(2)}, b_{\ell+1}^{(1)} \rangle. \end{aligned}$$

Then

$$\begin{aligned} & \left| \frac{1}{m} \langle b_\ell^{(1)}, b_\ell^{(2)} \rangle - (B_{\ell+1}(x^{(1)}, x^{(2)}) + \alpha^2 B_{\ell+1}(x^{(1)}, x^{(2)}) \Gamma_{\sigma'}(K_{\ell-1})(x^{(1)}, x^{(2)})) \right| \\ & \leq \left| \frac{1}{m} \langle b_{\ell+1}^{(1)}, b_{\ell+1}^{(2)} \rangle - B_{\ell+1}(x^{(1)}, x^{(2)}) \right| + \alpha^2 \left| P - B_{\ell+1}(x^{(1)}, x^{(2)}) \Gamma_{\sigma'}(K_{\ell-1})(x^{(1)}, x^{(2)}) \right| + \alpha|Q| + \alpha|R| \\ & \leq \tau + \alpha^2 \left| P - \frac{2}{m} \langle D_\ell^{(1)} V_\ell^\top \frac{b_{\ell+1}^{(1)}}{\sqrt{m}}, D_\ell^{(2)} V_\ell^\top \frac{b_{\ell+1}^{(2)}}{\sqrt{m}} \rangle \right| \\ & \quad + \alpha^2 \left| \frac{2}{m} \langle D_\ell^{(1)} V_\ell^\top \frac{b_{\ell+1}^{(1)}}{\sqrt{m}}, D_\ell^{(2)} V_\ell^\top \frac{b_{\ell+1}^{(2)}}{\sqrt{m}} \rangle - \langle \frac{b_{\ell+1}^{(1)}}{\sqrt{m}}, \frac{b_{\ell+1}^{(2)}}{\sqrt{m}} \rangle \frac{2}{m} \text{Tr}(D_\ell^{(1)} D_\ell^{(2)}) \right| \\ & \quad + \alpha^2 \left| \langle \frac{b_{\ell+1}^{(1)}}{\sqrt{m}}, \frac{b_{\ell+1}^{(2)}}{\sqrt{m}} \rangle - B_{\ell+1}(x^{(1)}, x^{(2)}) \right| \left| \frac{2}{m} \text{Tr}(D_\ell^{(1)} D_\ell^{(2)}) \right| \\ & \quad + \alpha^2 \left| B_{\ell+1}(x^{(1)}, x^{(2)}) \right| \left| \frac{2}{m} \text{Tr}(D_\ell^{(1)} D_\ell^{(2)}) - \Gamma_{\sigma'}(K_{\ell-1})(x^{(1)}, x^{(2)}) \right| \\ & \quad + \alpha|Q| + \alpha|R|. \end{aligned}$$

In Lemma 9 and Lemma 10, set  $\tilde{\epsilon} = cL^{\gamma-1}\tau$ ,  $\epsilon = c\tau$ ,  $\delta = \tilde{\delta} = \delta' = \delta_4/5L$ . When  $m \geq \max\{\frac{C}{\tau^2}(1 + \log \frac{30L}{\delta_4}), \frac{C}{\tau^2} \log \frac{40L^2}{\delta_4}, \frac{C}{\tau^2} L^{2-2\gamma} \log \frac{80L^2}{\delta_4}, cL^{2-2\gamma} \log \frac{80L^2}{\delta_4}\}$ , with probability at least  $1 - \frac{\delta_4}{L}$ , the results of Lemma 9 and Lemma 10 hold. Then for all  $(x^{(1)}, x^{(2)}) \in \{(x, x), (x, \tilde{x}), (\tilde{x}, \tilde{x})\}$ ,

$$\begin{aligned} \left| \frac{1}{m} \langle b_\ell^{(1)}, b_\ell^{(2)} \rangle - B_\ell(x^{(1)}, x^{(2)}) \right| & \leq \tau + \alpha^2 c\tau + \alpha^2 c\tau + \alpha^2 2\tau + \alpha^2 e\epsilon_2 + 2\alpha cL^{a-1}\tau \\ & \leq \tau(1 + \mathcal{O}(1/L)). \quad (\text{Set } \epsilon_2 \leq c\tau.) \end{aligned}$$

By taking union bound, with probability at least  $1 - \delta_4$ , we have for all  $\ell = 1, 2, \dots, L$ ,

$$\left\| \hat{\Theta}_{\ell+1}(x, \tilde{x}) - \Theta_{\ell+1}(x, \tilde{x}) \right\|_{\max} \leq (1 + \mathcal{O}(1/L))^L \epsilon_4 \leq C\epsilon_4.$$

Meanwhile, we have for all  $(x^{(1)}, x^{(2)}) \in \{(x, x), (x, \tilde{x}), (\tilde{x}, \tilde{x})\}$  and  $\ell = 1, \dots, L$ ,

$$\left| \frac{2}{m} \langle D_\ell^{(1)} V_\ell^\top \frac{b_{\ell+1}^{(1)}}{\sqrt{m}}, D_\ell^{(2)} V_\ell^\top \frac{b_{\ell+1}^{(2)}}{\sqrt{m}} \rangle - B_{\ell+1}(x^{(1)}, x^{(2)}) \Gamma_{\sigma'}(K_{\ell-1})(x^{(1)}, x^{(2)}) \right| \leq (2+c)\tau + e\epsilon_2 \leq C\epsilon_4.$$

## Step 5. Summary

Using previous results, for all  $\ell$ , we have

$$\begin{aligned} & \left| \frac{1}{\alpha^2} \langle \nabla_{V_\ell} f, \nabla_{V_\ell} \tilde{f} \rangle - B_{\ell+1} \Gamma_\sigma(K_{\ell-1}) \right| \\ & \leq \left| \frac{1}{m} \langle b_{\ell+1}, \tilde{b}_{\ell+1} \rangle - B_{\ell+1} \right| \cdot |\langle \phi_{W_\ell}(x_{\ell-1}), \phi_{W_\ell}(\tilde{x}_{\ell-1}) \rangle| + |B_{\ell+1}| \cdot |\langle \phi_{W_\ell}(x_{\ell-1}), \phi_{W_\ell}(\tilde{x}_{\ell-1}) \rangle - \Gamma_\sigma(K_{\ell-1})| \\ & \leq C\epsilon_4 + C\epsilon_2^2, \end{aligned}$$

and

$$\begin{aligned} & \left| \frac{1}{\alpha^2} \langle \nabla_{W_\ell} f, \nabla_{W_\ell} \tilde{f} \rangle - K_{\ell-1} B_{\ell+1} \Gamma_{\sigma'}(K_{\ell-1}) \right| \\ & \leq \left| \frac{1}{m} \langle x_{\ell-1}, \tilde{x}_{\ell-1} \rangle - K_{\ell-1} \right| \cdot \left| \frac{2}{m} \tilde{b}_{\ell+1}^\top V_\ell \tilde{D}_\ell D_\ell V_\ell^\top b_{\ell+1} \right| + |K_{\ell-1}| \cdot \left| \frac{2}{m} \tilde{b}_{\ell+1}^\top V_\ell \tilde{D}_\ell D_\ell V_\ell^\top b_{\ell+1} - B_{\ell+1} \Gamma_{\sigma'}(K_{\ell-1}) \right| \\ & \leq C\epsilon_2^2 + C\epsilon_4. \end{aligned}$$

To sum up, by choosing  $\epsilon_4 = c\epsilon_0$ ,  $\epsilon_2 = c\epsilon_4$ , and  $\delta_1 = \delta_2 = \delta_3 = \delta_4 = \delta_0/4$ , then with probability at least  $1 - \delta_0$ , when

$$\begin{aligned} m & \geq \frac{C}{\epsilon_0^4} L^{2-2\gamma} \left( \log \frac{320(L^2 + 1)}{\delta_0} + 1 \right) \\ & \geq \max \left\{ c \log \frac{16L}{\delta_0}, \frac{C}{\epsilon_0^4} L^{2-2\gamma} \log \frac{144(L+1)}{\delta_0}, \frac{C}{\epsilon_0^2} \log \frac{24L}{\delta_0}, \right. \\ & \quad \left. \frac{C}{\epsilon_0^2} \log \frac{8L}{\delta_0}, \frac{C}{\epsilon_0^2} (1 + \log \frac{120L}{\delta_0}), \frac{C}{\epsilon_0^2} \log \frac{160L^2}{\delta_0}, \frac{C}{\epsilon_0^2} L^{2-2\gamma} \log \frac{320L^2}{\delta_0}, cL^{2-2\gamma} \log \frac{320L^2}{\delta_0^4} \right\}, \end{aligned}$$

the desired results hold.  $\square$

## C Proofs of the Lemmas

### C.1 Supporting lemmas

**Lemma 11.** Define  $G = [\phi_{W_\ell}(x_{\ell-1}), \phi_{W_\ell}(\tilde{x}_{\ell-1})]$ , and  $\Pi_G^\perp$  as the orthogonal projection onto the orthogonal complement of the column space of  $G$ . when  $m \geq 1 + \log \frac{6}{\delta}$ , the following holds with probability at least  $1 - \delta$  for all  $(x^{(1)}, x^{(2)}) \in \{(x, x), (x, \tilde{x}), (\tilde{x}, \tilde{x})\}$ ,

$$\left| \frac{2}{m} \frac{b_{\ell+1}^{(1)\top}}{\sqrt{m}} V_\ell \Pi_G^\perp D_\ell^{(1)} D_\ell^{(2)} \Pi_G^\perp V_\ell^\top \frac{b_{\ell+1}^{(2)}}{\sqrt{m}} - \left\langle \frac{b_{\ell+1}^{(1)}}{\sqrt{m}}, \frac{b_{\ell+1}^{(2)}}{\sqrt{m}} \right\rangle \frac{2}{m} \text{Tr}(D_\ell^{(1)} D_\ell^{(2)}) \right| \leq (4 + 4\sqrt{2})M \sqrt{\frac{1 + \log \frac{6}{\delta}}{m}},$$

where

$$M = \max \left\{ \frac{\|b_{\ell+1}\|^2}{m}, \frac{\|\tilde{b}_{\ell+1}\|^2}{m} \right\}.$$

*proof of Lemma 11.* We prove the lemma on any realization of  $(A, W_1, V_1, \dots, W_{\ell-1}, V_{\ell-1}, W_\ell, W_{\ell+1}, V_{\ell+1}, \dots, W_L, V_L, v)$ ,  $V_\ell \phi_{W_\ell}(x_{\ell-1})$  and  $V_\ell \phi_{W_\ell}(\tilde{x}_{\ell-1})$ , and consider the remaining randomness of  $V_\ell$ . In this case,  $D_\ell, \tilde{D}_\ell, b_{\ell+1}$  and  $\tilde{b}_{\ell+1}$  are fixed.

One can show that conditioned on the realization of  $V_\ell G$  (whose ‘‘degree of freedom’’ is  $2m$ ),  $V_\ell \Pi_G^\perp$  is identically distributed as  $\tilde{V}_\ell \Pi_G^\perp$ , where  $\tilde{V}_\ell$  is an i.i.d. copy of  $V_\ell$ . The remaining  $m^2 - 2m$  ‘‘degree of freedom’’ is enough for a good concentration. For the proof of this result, we refer the readers to Lemma E.3 in [22].

Denote  $T = \Pi_G^\perp D_\ell^{(1)} D_\ell^{(2)} \Pi_G^\perp$ ,

$$S = \begin{bmatrix} \tilde{V}_\ell^\top \frac{b_{\ell+1}^{(1)}}{\sqrt{m}} \\ \tilde{V}_\ell^\top \frac{b_{\ell+1}^{(2)}}{\sqrt{m}} \end{bmatrix}.$$

We know that  $S$  is a  $2m$ -dimensional Gaussian random vector, and

$$S \sim \mathcal{N} \left( 0, \begin{bmatrix} \left\langle \frac{b_{\ell+1}^{(1)}}{\sqrt{m}}, \frac{b_{\ell+1}^{(1)}}{\sqrt{m}} \right\rangle I_m & \left\langle \frac{b_{\ell+1}^{(1)}}{\sqrt{m}}, \frac{b_{\ell+1}^{(2)}}{\sqrt{m}} \right\rangle I_m \\ \left\langle \frac{b_{\ell+1}^{(2)}}{\sqrt{m}}, \frac{b_{\ell+1}^{(1)}}{\sqrt{m}} \right\rangle I_m & \left\langle \frac{b_{\ell+1}^{(2)}}{\sqrt{m}}, \frac{b_{\ell+1}^{(2)}}{\sqrt{m}} \right\rangle I_m \end{bmatrix} \right).$$

Then there exists a matrix  $P \in \mathbb{R}^{2m \times 2m}$  such that

$$PP^\top = \begin{bmatrix} \langle \frac{b_{\ell+1}^{(1)}}{\sqrt{m}}, \frac{b_{\ell+1}^{(1)}}{\sqrt{m}} \rangle I_m & \langle \frac{b_{\ell+1}^{(1)}}{\sqrt{m}}, \frac{b_{\ell+1}^{(2)}}{\sqrt{m}} \rangle I_m \\ \langle \frac{b_{\ell+1}^{(2)}}{\sqrt{m}}, \frac{b_{\ell+1}^{(1)}}{\sqrt{m}} \rangle I_m & \langle \frac{b_{\ell+1}^{(2)}}{\sqrt{m}}, \frac{b_{\ell+1}^{(2)}}{\sqrt{m}} \rangle I_m \end{bmatrix},$$

and  $S \stackrel{d}{=} P\xi$ ,  $\xi \sim \mathcal{N}(0, I_{2m})$ .

Thus

$$\frac{b_{\ell+1}^{(1)}}{\sqrt{m}} \tilde{V}_\ell \Pi_G^\perp D_\ell^{(1)} D_\ell^{(2)} \Pi_G^\perp \tilde{V}_\ell^\top \frac{b_{\ell+1}^{(2)}}{\sqrt{m}} \stackrel{d}{=} \xi^\top P^\top \begin{bmatrix} I_m \\ 0 \end{bmatrix}^\top T \begin{bmatrix} 0 \\ I_m \end{bmatrix} P\xi = \frac{1}{2} \xi^\top P^\top \begin{bmatrix} 0 & T \\ T & 0 \end{bmatrix} P\xi.$$

We have

$$\begin{aligned} \left\| \frac{1}{2} P^\top \begin{bmatrix} 0 & T \\ T & 0 \end{bmatrix} P \right\| &\leq \frac{1}{2} \|P^\top\| \cdot \|P\| \cdot \left\| \begin{bmatrix} 0 & T \\ T & 0 \end{bmatrix} \right\| \\ &= \frac{1}{2} \|PP^\top\| \cdot \|T\| \\ &\leq \frac{1}{2} \left\| \begin{bmatrix} \langle \frac{b_{\ell+1}^{(1)}}{\sqrt{m}}, \frac{b_{\ell+1}^{(1)}}{\sqrt{m}} \rangle I_m & \langle \frac{b_{\ell+1}^{(1)}}{\sqrt{m}}, \frac{b_{\ell+1}^{(2)}}{\sqrt{m}} \rangle I_m \\ \langle \frac{b_{\ell+1}^{(2)}}{\sqrt{m}}, \frac{b_{\ell+1}^{(1)}}{\sqrt{m}} \rangle I_m & \langle \frac{b_{\ell+1}^{(2)}}{\sqrt{m}}, \frac{b_{\ell+1}^{(2)}}{\sqrt{m}} \rangle I_m \end{bmatrix} \right\| \|\Pi_G^\perp\| \|D_\ell^{(1)}\| \|D_\ell^{(2)}\| \|\Pi_G^\perp\| \\ &\leq \frac{\langle \frac{b_{\ell+1}^{(1)}}{\sqrt{m}}, \frac{b_{\ell+1}^{(1)}}{\sqrt{m}} \rangle + \langle \frac{b_{\ell+1}^{(2)}}{\sqrt{m}}, \frac{b_{\ell+1}^{(2)}}{\sqrt{m}} \rangle}{2} \leq M. \end{aligned}$$

$$\text{And } \left\| \frac{1}{2} P^\top \begin{bmatrix} 0 & T \\ T & 0 \end{bmatrix} P \right\|_F \leq \sqrt{2m}M.$$

Then by the Hanson-Wright Inequality for Gaussian chaos [40], we have with probability at least  $1 - \delta/3$ ,

$$\begin{aligned} &\frac{2}{m} \left| \frac{b_{\ell+1}^{(1)}}{\sqrt{m}} \tilde{V}_\ell \Pi_G^\perp D_\ell^{(1)} D_\ell^{(2)} \Pi_G^\perp \tilde{V}_\ell^\top \frac{b_{\ell+1}^{(2)}}{\sqrt{m}} - \mathbb{E}_{\tilde{V}_\ell} \left[ \frac{b_{\ell+1}^{(1)}}{\sqrt{m}} \tilde{V}_\ell \Pi_G^\perp D_\ell^{(1)} D_\ell^{(2)} \Pi_G^\perp \tilde{V}_\ell^\top \frac{b_{\ell+1}^{(2)}}{\sqrt{m}} \right] \right| \\ &\leq \frac{4}{m} \left( \sqrt{2m}M \sqrt{\log \frac{6}{\delta}} + M \log \frac{6}{\delta} \right), \end{aligned}$$

Furthermore, we have

$$\mathbb{E}_{\tilde{V}_\ell} \left[ \frac{b_{\ell+1}^{(1)}}{\sqrt{m}} \tilde{V}_\ell \Pi_G^\perp D_\ell^{(1)} D_\ell^{(2)} \Pi_G^\perp \tilde{V}_\ell^\top \frac{b_{\ell+1}^{(2)}}{\sqrt{m}} \right] = \langle \frac{b_{\ell+1}^{(1)}}{\sqrt{m}}, \frac{b_{\ell+1}^{(1)}}{\sqrt{m}} \rangle \text{Tr}(\Pi_G^\perp D_\ell^{(1)} D_\ell^{(2)}).$$

Thus

$$\begin{aligned} &\left| \frac{2}{m} \mathbb{E}_{\tilde{V}_\ell} \left[ \frac{b_{\ell+1}^{(1)}}{\sqrt{m}} \tilde{V}_\ell \Pi_G^\perp D_\ell^{(1)} D_\ell^{(2)} \Pi_G^\perp \tilde{V}_\ell^\top \frac{b_{\ell+1}^{(2)}}{\sqrt{m}} \right] - \langle \frac{b_{\ell+1}^{(1)}}{\sqrt{m}}, \frac{b_{\ell+1}^{(1)}}{\sqrt{m}} \rangle \frac{2}{m} \text{Tr}(D_\ell^{(1)} D_\ell^{(2)}) \right| \\ &= \frac{2}{m} \left| \langle \frac{b_{\ell+1}^{(1)}}{\sqrt{m}}, \frac{b_{\ell+1}^{(1)}}{\sqrt{m}} \rangle \text{Tr}(\Pi_G D_\ell^{(1)} D_\ell^{(2)}) \right| \\ &\leq \frac{2}{m} M \text{Tr}(\Pi_G D_\ell^{(1)} D_\ell^{(2)} \Pi_G) \\ &\leq \frac{4}{m} M. \end{aligned}$$

By taking union bound, we have with probability at least  $1 - \delta$ , for all  $(x^{(1)}, x^{(2)}) \in \{(x, x), (x, \tilde{x}), (\tilde{x}, \tilde{x})\}$ ,

$$\begin{aligned} &\left| \frac{2}{m} \frac{b_{\ell+1}^{(1)}}{\sqrt{m}} V_\ell \Pi_G^\perp D_\ell^{(1)} D_\ell^{(2)} \Pi_G^\perp V_\ell^\top \frac{b_{\ell+1}^{(2)}}{\sqrt{m}} - \langle \frac{b_{\ell+1}^{(1)}}{\sqrt{m}}, \frac{b_{\ell+1}^{(1)}}{\sqrt{m}} \rangle \frac{2}{m} \text{Tr}(D_\ell^{(1)} D_\ell^{(2)}) \right| \\ &\leq \frac{4}{m} \left( \sqrt{2m}M \sqrt{\log \frac{6}{\delta}} + M \log \frac{6}{\delta} \right) + \frac{4}{m} M \\ &\leq (4 + 4\sqrt{2})M \sqrt{\frac{1 + \log \frac{6}{\delta}}{m}}, \end{aligned}$$



where the last inequality holds when  $m \geq 1 + \log \frac{6}{\delta}$ .  $\square$

**Lemma 12** (Norm controls of  $b_{\ell+1}$ ). *Assume the following inequalities hold simultaneously for all  $\ell = 1, 2, \dots, L$*

$$\left\| \frac{1}{\sqrt{m}} W_\ell \right\| \leq C, \quad \left\| \frac{1}{\sqrt{m}} V_\ell \right\| \leq C.$$

Then for any fixed input  $x$ ,  $1 \leq \ell \leq L$  and  $u \in \mathbb{R}^m$ , when

$$m \geq cL^{2-2\gamma} \log \frac{2L}{\delta'},$$

with probability at least  $1 - \delta'$  over the randomness of  $W_{\ell+1}, V_{\ell+1}, \dots, W_L, V_L, v$ , we have

$$|\langle u, b_{\ell+1} \rangle| \leq C' \|u\| \sqrt{\log \frac{2L}{\delta'}}.$$

*proof of Lemma 12.* Denote  $u_\ell = u$ , and

$$u_{i+1} = \alpha \sqrt{\frac{1}{m}} \sqrt{\frac{2}{m}} V_{i+1} D_{i+1} W_{i+1} u_i + u_i, \quad i = \ell, \ell + 1, \dots, L - 1.$$

One can show that  $\langle u, b_{\ell+1} \rangle = \langle v, u_L \rangle$ . Next we show that  $\|u_{i+1}\| = (1 + \mathcal{O}(\frac{1}{L}))\|u_i\|$  with high probability. First write

$$\|u_{i+1}\|^2 = \|u_i\|^2 + \alpha^2 \left\| \sqrt{\frac{1}{m}} \sqrt{\frac{2}{m}} V_{i+1} D_{i+1} W_{i+1} u_i \right\|^2 + 2\alpha \left\langle u_i, \sqrt{\frac{1}{m}} \sqrt{\frac{2}{m}} V_{i+1} D_{i+1} W_{i+1} u_i \right\rangle.$$

By the assumption we have

$$\begin{aligned} \left\| \sqrt{\frac{2}{m}} D_{i+1} W_{i+1} u_i \right\| &\leq \sqrt{2} C \|u_i\|, \\ \left\| \sqrt{\frac{1}{m}} \sqrt{\frac{2}{m}} V_{i+1} D_{i+1} W_{i+1} u_i \right\| &\leq \sqrt{2} C^2 \|u_i\|. \end{aligned}$$

With probability at least  $1 - \delta'/L$  over the randomness of  $V_{i+1}$ , we have

$$\left| \left\langle u_i, \sqrt{\frac{1}{m}} \sqrt{\frac{2}{m}} V_{i+1} D_{i+1} W_{i+1} u_i \right\rangle \right| \leq \|u_i\| \cdot \left\| \sqrt{\frac{2}{m}} D_{i+1} W_{i+1} u_i \right\| \sqrt{\frac{c \log \frac{2L}{\delta'}}{m}}.$$

Then when

$$m \geq cL^{2-2\gamma} \log \frac{2L}{\delta'},$$

we have

$$\begin{aligned} \|u_{i+1}\|^2 &= \|u_i\|^2 + \alpha^2 \left\| \sqrt{\frac{1}{m}} \sqrt{\frac{2}{m}} V_{i+1} D_{i+1} W_{i+1} u_i \right\|^2 + 2\alpha \langle u_i, \sqrt{\frac{1}{m}} \sqrt{\frac{2}{m}} V_{i+1} D_{i+1} W_{i+1} u_i \rangle \\ &\leq (1 + 2C^4/L) \|u_i\|^2 + 2\alpha \sqrt{2} C \|u_i\|^2 \sqrt{\frac{c \log \frac{2L}{\delta'}}{m}} \\ &\leq (1 + 2C^4/L + 2\sqrt{2}C/L) \|u_i\|^2 = (1 + \mathcal{O}(1/L)) \|u_i\|^2. \end{aligned}$$

Then with probability at least  $1 - \delta'(L-1)/L$  we have  $\|u_L\| \leq C\|u\|$ . Finally the result holds from the standard concentration bound for Gaussian random variables [39].  $\square$

## C.2 Proofs of Lemma 9

*proof of Lemma 9.* By the assumption, we have

$$\frac{1}{m} \|b_{\ell+1}\|^2 \leq B_{\ell+1}(x, x) + 1 \leq 4.$$

Similarly,  $\frac{1}{m} \|\tilde{b}_{\ell+1}\|^2 \leq 4$ . Then by Lemma 11, when  $m \geq \frac{C}{\epsilon^2} (1 + \log \frac{6}{\delta})$ , we have for all  $(x^{(1)}, x^{(2)}) \in \{(x, x), (x, \tilde{x}), (\tilde{x}, \tilde{x})\}$ ,

$$\left| \frac{2}{m} \frac{b_{\ell+1}^{(1)\top}}{\sqrt{m}} V_\ell \Pi_G^\perp D_\ell^{(1)} D_\ell^{(2)} \Pi_G^\perp V_\ell^\top \frac{b_{\ell+1}^{(2)}}{\sqrt{m}} - \left\langle \frac{b_{\ell+1}^{(1)}}{\sqrt{m}}, \frac{b_{\ell+1}^{(2)}}{\sqrt{m}} \right\rangle \frac{2}{m} \text{Tr}(D_\ell^{(1)} D_\ell^{(2)}) \right| \leq c\epsilon.$$

Specifically, we have

$$\left\| \sqrt{\frac{2}{m}} \frac{b_{\ell+1}^{(1)\top}}{\sqrt{m}} V_\ell \Pi_G^\perp D_\ell \right\| \leq \sqrt{c\epsilon + \frac{2}{m} \text{Tr}(D_\ell) \frac{1}{m} \|b_{\ell+1}\|^2} \leq \mathcal{O}(1),$$

and similarly

$$\left\| \sqrt{\frac{2}{m}} \frac{\tilde{b}_{\ell+1}}{\sqrt{m}}^\top V_\ell \Pi_G^\perp \tilde{D}_\ell \right\| \leq \mathcal{O}(1).$$

Next we bound

$$\left\| \frac{b_{\ell+1}}{\sqrt{m}}^\top V_\ell \Pi_G \right\|.$$

Notice that  $\Pi_G$  is an orthogonal projection onto the column space of  $G$ , which is at most 2-dimension. One can write  $\Pi_G = u_1 u_1^\top + u_2 u_2^\top$ , where  $\|u_i\| = 1$  or 0. By Lemma 12, fixing  $u_1, u_2$  and  $V_\ell$ , w.p greater than  $1 - \delta'$  over the randomness of  $W_{\ell+1}, V_{\ell+1}, \dots, W_L, V_L, v$ , we have

$$\left| b_{\ell+1}^\top \frac{1}{\sqrt{m}} V_\ell u_i \right| \leq C'' \sqrt{\log \frac{8L}{\delta'}},$$

and

$$\left| \tilde{b}_{\ell+1}^\top \frac{1}{\sqrt{m}} V_\ell u_i \right| \leq C'' \sqrt{\log \frac{8L}{\delta'}},$$

for both  $i = 1, 2$  when

$$m \geq cL^{2-2\gamma} \log \frac{8L}{\delta'}.$$

Therefore

$$\left\| \frac{b_{\ell+1}}{\sqrt{m}}^\top V_\ell \Pi_G \right\|, \left\| \frac{\tilde{b}_{\ell+1}}{\sqrt{m}}^\top V_\ell \Pi_G \right\| \leq \mathcal{O}\left(\sqrt{\log \frac{8L}{\delta'}}\right).$$

Finally, using  $I_m = \Pi_G + \Pi_G^\perp$ , we have

$$\begin{aligned} & \left| \frac{2}{m} \frac{b_{\ell+1}^{(1)}}{\sqrt{m}}^\top V_\ell D_\ell^{(1)} D_\ell^{(2)} V_\ell^\top \frac{b_{\ell+1}^{(2)}}{\sqrt{m}} - \left\langle \frac{b_{\ell+1}^{(1)}}{\sqrt{m}}, \frac{b_{\ell+1}^{(2)}}{\sqrt{m}} \right\rangle \frac{2}{m} \text{Tr}(D_\ell^{(1)} D_\ell^{(2)}) \right| \\ & \leq \left| \frac{2}{m} \frac{b_{\ell+1}^{(1)}}{\sqrt{m}}^\top V_\ell \Pi_G^\perp D_\ell^{(1)} D_\ell^{(2)} \Pi_G^\perp V_\ell^\top \frac{b_{\ell+1}^{(2)}}{\sqrt{m}} - \left\langle \frac{b_{\ell+1}^{(1)}}{\sqrt{m}}, \frac{b_{\ell+1}^{(2)}}{\sqrt{m}} \right\rangle \frac{2}{m} \text{Tr}(D_\ell^{(1)} D_\ell^{(2)}) \right| \\ & \quad + \sqrt{\frac{2}{m}} \left| \frac{b_{\ell+1}^{(1)}}{\sqrt{m}}^\top V_\ell \Pi_G D_\ell^{(1)} D_\ell^{(2)} \Pi_G^\perp V_\ell^\top \frac{b_{\ell+1}^{(2)}}{\sqrt{m}} \sqrt{\frac{2}{m}} \right| \\ & \quad + \sqrt{\frac{2}{m}} \left| \sqrt{\frac{2}{m}} \frac{b_{\ell+1}^{(1)}}{\sqrt{m}}^\top V_\ell \Pi_G^\perp D_\ell^{(1)} D_\ell^{(2)} \Pi_G V_\ell^\top \frac{b_{\ell+1}^{(2)}}{\sqrt{m}} \right| \\ & \quad + \frac{2}{m} \left| \frac{b_{\ell+1}^{(1)}}{\sqrt{m}}^\top V_\ell \Pi_G D_\ell^{(1)} D_\ell^{(2)} \Pi_G V_\ell^\top \frac{b_{\ell+1}^{(2)}}{\sqrt{m}} \right| \\ & \leq c\epsilon + \sqrt{\frac{2}{m}} \mathcal{O}\left(\sqrt{\log \frac{8L}{\delta'}}\right) + \frac{2}{m} \mathcal{O}\left(\log \frac{8L}{\delta'}\right) \leq \epsilon. \end{aligned}$$

The last inequality holds when  $m \geq \frac{C}{\epsilon^2} \log \frac{8L}{\delta'}$ .  $\square$

### C.3 Proof of Lemma 10

*proof of Lemma 10.* The first part of the proof is essentially the same as Lemma 9. Define

$$d_{\ell+1} = D_\ell \frac{1}{\sqrt{m}} V_\ell^\top \frac{b_{\ell+1}}{\sqrt{m}}, \quad \tilde{d}_{\ell+1} = \tilde{D}_\ell \frac{1}{\sqrt{m}} V_\ell^\top \frac{\tilde{b}_{\ell+1}}{\sqrt{m}}.$$

We know that  $d_{\ell+1}$  and  $\tilde{d}_{\ell+1}$  depend on  $W_\ell$  only through  $W_\ell x_{\ell-1}$  and  $W_\ell \tilde{x}_{\ell-1}$ . Let  $H = [x_{\ell-1}, \tilde{x}_{\ell-1}]$ . Then

$$\begin{aligned} & \left| \frac{2}{m} \langle W_\ell^\top d_{\ell+1}^{(1)}, W_\ell^\top d_{\ell+1}^{(2)} \rangle - 2 \langle d_{\ell+1}^{(1)}, d_{\ell+1}^{(2)} \rangle \right| \\ & \leq \left| \frac{2}{m} \langle \Pi_H^\perp W_\ell^\top d_{\ell+1}^{(1)}, \Pi_H^\perp W_\ell^\top d_{\ell+1}^{(2)} \rangle - 2 \langle d_{\ell+1}^{(1)}, d_{\ell+1}^{(2)} \rangle \right| + \left| \frac{2}{m} \langle \Pi_H W_\ell^\top d_{\ell+1}^{(1)}, \Pi_H W_\ell^\top d_{\ell+1}^{(2)} \rangle \right| \\ & \quad + \left| \frac{2}{m} \langle \Pi_H^\perp W_\ell^\top d_{\ell+1}^{(1)}, \Pi_H W_\ell^\top d_{\ell+1}^{(2)} \rangle \right| + \left| \frac{2}{m} \langle \Pi_H W_\ell^\top d_{\ell+1}^{(1)}, \Pi_H W_\ell^\top d_{\ell+1}^{(2)} \rangle \right|. \end{aligned}$$

Since  $\|d_{\ell+1}\|, \|\tilde{d}_{\ell+1}\| = \mathcal{O}(1)$ , similar to Lemma 11, when  $m \geq 1 + \log \frac{6}{\delta}$ , w.p at least  $1 - \delta$  we have

$$\left| \frac{2}{m} \langle \Pi_H^\perp W_\ell^\top d_{\ell+1}^{(1)}, \Pi_H^\perp W_\ell^\top d_{\ell+1}^{(2)} \rangle - 2 \langle d_{\ell+1}^{(1)}, d_{\ell+1}^{(2)} \rangle \right| \leq \mathcal{O}\left(\sqrt{\frac{1 + \log \frac{6}{\delta}}{m}}\right),$$

and

$$\left\| \sqrt{\frac{2}{m}} \Pi_H^\perp W_\ell^\top d_{\ell+1}^{(i)} \right\| = \mathcal{O}(1), \quad i = 1, 2,$$

Using the same argument as in the proof of Lemma 9, we decompose  $\Pi_H$  into two vectors  $w_1$  and  $w_2$ , whose randomness comes from  $W_1, V_1, \dots, W_{\ell-1}, V_{\ell-1}$ . By writing

$$w_i^\top W_\ell^\top d_{\ell+1}^{(i)} = \langle b_{\ell+1}^{(i)}, \frac{1}{\sqrt{m}} V_\ell D_\ell^{(i)} \frac{1}{\sqrt{m}} W_\ell w_i \rangle,$$

we can also apply Lemma 12. Then we conclude that w.p. greater than  $1 - \delta'$  over the randomness of  $v$ , we have

$$\|\Pi_H W_\ell^\top d_{\ell+1}\|, \|\Pi_H W_\ell^\top \tilde{d}_{\ell+1}\| = \mathcal{O}\left(\sqrt{\log \frac{8L}{\delta'}}\right),$$

when

$$m \geq cL^{2-2\gamma} \log \frac{8L}{\delta'}.$$

Then exactly the same result of Lemma 9 holds.

For the second part, notice that

$$\begin{aligned} \frac{1}{m} \sqrt{\frac{1}{m}} \sqrt{\frac{2}{m}} \langle W_\ell^\top D_\ell^{(1)} V_\ell^\top b_{\ell+1}^{(1)}, b_{\ell+1}^{(2)} \rangle &= \sqrt{\frac{2}{m}} \langle W_\ell^\top D_\ell^{(1)} \sqrt{\frac{1}{m}} V_\ell^\top \frac{b_{\ell+1}^{(1)}}{\sqrt{m}}, \frac{b_{\ell+1}^{(2)}}{\sqrt{m}} \rangle \\ &= \sqrt{\frac{2}{m}} \langle W_\ell^\top d_{\ell+1}^{(1)}, \frac{b_{\ell+1}^{(2)}}{\sqrt{m}} \rangle \\ &= \sqrt{\frac{2}{m}} \langle \Pi_H^\perp W_\ell^\top d_{\ell+1}^{(1)}, \frac{b_{\ell+1}^{(2)}}{\sqrt{m}} \rangle + \sqrt{\frac{2}{m}} \langle \Pi_H \frac{1}{\sqrt{m}} W_\ell^\top d_{\ell+1}^{(1)}, b_{\ell+1}^{(2)} \rangle. \end{aligned}$$

Conditioned on  $x_{\ell-1}, \tilde{x}_{\ell-1}, W_\ell x_{\ell-1}$ , and  $W_\ell \tilde{x}_{\ell-1}$ ,  $W_\ell$  is independent of  $b_{\ell+1}, \tilde{b}_{\ell+1}, d_{\ell+1}$ , and  $\tilde{d}_{\ell+1}$ . Furthermore, we have  $\Pi_H^\perp W_\ell^\top =_d \Pi_H^\perp \widehat{W}_\ell^\top$ , where  $\widehat{W}_\ell$  is an i.i.d. copy of  $W_\ell$ . Then for the first term, with probability at least  $1 - \delta/2$ , we have for all  $(x^{(1)}, x^{(2)}) \in \{(x, x), (x, \tilde{x}), (\tilde{x}, x), (\tilde{x}, \tilde{x})\}$ ,

$$\left| \sqrt{\frac{2}{m}} \langle \Pi_H^\perp W_\ell^\top d_{\ell+1}^{(1)}, \frac{b_{\ell+1}^{(2)}}{\sqrt{m}} \rangle \right| \leq \left\| \Pi_H^\perp \frac{b_{\ell+1}^{(2)}}{\sqrt{m}} \right\| \|d_{\ell+1}^{(1)}\| \sqrt{\frac{2c \log \frac{16}{\delta}}{m}} \leq \mathcal{O}\left(\sqrt{\frac{\log \frac{16}{\delta}}{m}}\right).$$

For the second term, write  $\Pi_H = w_1 w_1^\top + w_2 w_2^\top$ , where  $\|w_i\| = 1$  or  $0$ . Then by Lemma 12, with probability at least  $1 - \delta/2$ , for all  $(x^{(1)}, x^{(2)}) \in \{(x, x), (x, \tilde{x}), (\tilde{x}, x), (\tilde{x}, \tilde{x})\}$ , when  $m \geq cL^{2-2\gamma} \log \frac{16L}{\delta}$ , we have

$$\begin{aligned} \left| \sqrt{\frac{2}{m}} \langle w_i w_i^\top \frac{1}{\sqrt{m}} W_\ell^\top d_{\ell+1}^{(1)}, b_{\ell+1}^{(2)} \rangle \right| &= \left| \sqrt{\frac{2}{m}} w_i^\top \frac{1}{\sqrt{m}} W_\ell^\top d_{\ell+1}^{(1)} \langle w_i, b_{\ell+1}^{(2)} \rangle \right| \\ &\leq \sqrt{\frac{2}{m}} \|w_i\| \left\| \frac{1}{\sqrt{m}} W_\ell^\top \right\| \|d_{\ell+1}^{(1)}\| \left| \langle w_i, b_{\ell+1}^{(2)} \rangle \right| \\ &\leq \mathcal{O}\left(\sqrt{\frac{\log \frac{16L}{\delta}}{m}}\right). \end{aligned}$$

□

## D Proof of Theorem 5

*Proof.* For  $x, \tilde{x} \in \mathbb{S}^{D-1}$ , we have  $K_\ell(x, x) = K_\ell(\tilde{x}, \tilde{x}) = 1$  for all  $\ell$ . Hence we only need to study when  $x \neq \tilde{x}$ . Note we have

$$K_\ell(x, \tilde{x}) = \Gamma_\sigma(K_{\ell-1})(x, \tilde{x}) = \hat{\sigma}(K_{\ell-1}(x, \tilde{x})), \text{ and } \Gamma_{\sigma'}(K_\ell)(x, \tilde{x}) = \hat{\sigma}'(K_\ell(x, \tilde{x})).$$

For simplicity, we use  $K_\ell$  to denote  $K_\ell(x, \tilde{x})$ , where  $x \neq \tilde{x}$  and  $x, \tilde{x} \in \mathbb{S}^{D-1}$ .

Recall that

$$\hat{\sigma}(\rho) = \frac{\sqrt{1-\rho^2} + (\pi - \cos^{-1}(\rho))\rho}{\pi}, \text{ and } \hat{\sigma}'(\rho) = \frac{\pi - \cos^{-1}(\rho)}{\pi}.$$

Hence we have  $\hat{\sigma}(1) = 1$ ,  $K_{\ell-1} \leq \hat{\sigma}(K_{\ell-1}) = K_\ell$ ,  $(\hat{\sigma})'(\rho) = \hat{\sigma}'(\rho) \in [0, 1]$ , and  $(\hat{\sigma}')'(\rho) \geq 0$ . Then  $\hat{\sigma}$  is a convex function.

Since  $\{K_\ell\}$  is an increasing sequence and  $|K_\ell| \leq 1$ , we have  $K_\ell$  converges as  $\ell \rightarrow \infty$ . Taking the limit of both sides of  $\hat{\sigma}(K_{\ell-1}) = K_\ell$ , we have  $K_\ell \rightarrow 1$  as  $\ell \rightarrow \infty$ .

For  $K_\ell$ , we also have

$$K_\ell = \hat{\sigma}(K_{\ell-1}) = \frac{\sqrt{1 - K_{\ell-1}^2} + (\pi - \cos^{-1}(K_{\ell-1}))K_{\ell-1}}{\pi} = K_{\ell-1} + \frac{\sqrt{1 - K_{\ell-1}^2} - \cos^{-1}(K_{\ell-1})K_{\ell-1}}{\pi}.$$

Let  $e_\ell = 1 - K_\ell$ , we can easily check that

$$e_{\ell-1} - \frac{e_{\ell-1}^{3/2}}{\pi} \leq e_\ell \leq e_{\ell-1} - \frac{2\sqrt{2}e_{\ell-1}^{3/2}}{3\pi}. \quad (19)$$

Hence as  $e_\ell \rightarrow 0$ , we have  $\frac{e_\ell}{e_{\ell-1}} \rightarrow 1$ , which implies  $\{K_\ell\}$  converges sublinearly.

Assume  $e_\ell = \frac{C}{\ell^p} + \mathcal{O}(\ell^{-(p+1)})$ . By taking the assumption into (19) and comparing the highest order of both sides, we have  $p = 2$ .

Thus  $\exists C$ , s.t.  $|1 - K_\ell| \leq \frac{C}{\ell^2}$ , i.e. the convergence rate of  $K_\ell$  is  $\mathcal{O}(\frac{1}{\ell^2})$ .

**Lemma 13.** *For each  $K_0 < 1$ , there exists  $p > 0$  and  $n_0 = n_0(\delta) > 0$ , such that  $K_n \leq 1 - \frac{9\pi^2}{2(n+n_0)^{2+\frac{\log(L)^p}{L}}}$ ,  $\forall n = 0, \dots, L$ , when  $L$  is large.*

*Proof.* First, solve  $K_0 \leq 1 - \frac{9\pi^2}{2n^{2+\frac{\log(L)^p}{L}}}$ . Then we can choose  $n_0 \geq \sqrt{\frac{9\pi^2}{2\delta}} \geq \sqrt{\frac{9\pi^2}{2(1-K_0)}}$ , which is independent of  $L$  and  $n$ . For the rest of the proof, without loss of generality, we just use  $n$  instead of  $n+n_0$ . Also for small  $\delta$  (when  $\delta$  is not small enough we can pick a small  $\delta_0 < \delta$  and let  $n_0 \geq \sqrt{\frac{9\pi^2}{2\delta_0}}$ ), we have  $\frac{9\pi^2}{2(n+n_0)^{2+\frac{\log(L)^p}{L}}} \leq \delta$  (or  $\delta_0$ ) which is also small.

Let  $K_n = 1 - \epsilon$ . Then, when  $\epsilon$  is small, we have

$$K_{n+1} - K_n = \hat{\sigma}(K_n) - K_n = \mathcal{O}(\epsilon^{3/2}).$$

Also, we have

$$\begin{aligned} \left(1 - \frac{9\pi^2}{2(n+1)^{2+\frac{\log(L)^p}{L}}}\right) - \left(1 - \frac{9\pi^2}{2n^{2+\frac{\log(L)^p}{L}}}\right) &= \mathcal{O}\left(\frac{1}{n^{3+\frac{\log(L)^p}{L}}}\right) \\ &\geq \mathcal{O}\left(\left(\frac{1}{n^{2+\frac{\log(L)^p}{L}}}\right)^{3/2}\right) = \mathcal{O}\left(\frac{1}{n^{3+\frac{3\log(L)^p}{2L}}}\right). \end{aligned}$$

Overall, we want an upper bound for  $K_n$  and from the above we only know that  $K_n$  is of order  $1 - \mathcal{O}(n^{-2})$  but this order may hide some terms of logarithmic order. Hence we use the order  $1 - \mathcal{O}(n^{-(2+\epsilon)})$  to provide an upper bound of  $K_n$ . Here  $\frac{\log(L)^p}{L}$  is constructed for the convenience of the rest of the proof.  $\square$

Let  $N_0 = N_0(L)$  be the solution of

$$\cos\left(\pi\left(1 - \left(\frac{n+1}{n+2}\right)^{3-\frac{\log(L)^2}{L}}\right)\right) = \hat{\sigma}\left(\cos\left(\pi\left(1 - \left(\frac{n}{n+1}\right)^{3-\frac{\log(L)^2}{L}}\right)\right)\right),$$

where for  $N_0 < n < N_L$  with some  $N_L$ , we have

$$\cos\left(\pi\left(1 - \left(\frac{n+1}{n+2}\right)^{3-\frac{\log(L)^2}{L}}\right)\right) \geq \hat{\sigma}\left(\cos\left(\pi\left(1 - \left(\frac{n}{n+1}\right)^{3-\frac{\log(L)^2}{L}}\right)\right)\right).$$

One can check by series expansion that  $N_0 = N_0(L) \leq 5\frac{L}{\log(L)^2}$ .

Next we would like to find  $n$  such that

$$K_n = \cos\left(\pi\left(1 - \left(\frac{5\frac{L}{\log(L)^2}}{5\frac{L}{\log(L)^2} + 1}\right)^{3-\frac{\log(L)^2}{L}}\right)\right).$$

By series expansion, we know

$$\cos \left( \pi \left( 1 - \left( \frac{5L}{5 \frac{L}{\log(L)^2} + 1} \right)^{3 - \frac{\log(L)^2}{L}} \right) \right) \geq 1 - \frac{9\pi^2}{2 \left( \frac{5L}{\log(L)^2} \right)^2}.$$

Then it suffices to solve

$$1 - \frac{9\pi^2}{2 \left( \frac{5L}{\log(L)^2} \right)^2} \geq 1 - \frac{9\pi^2}{2n^{2 + \frac{\log(L)^p}{L}}} \geq K_n, \text{ i.e., } n^{2 + \frac{\log(L)^p}{L}} \leq \left( \frac{5L}{\log(L)^2} \right)^2. \quad (20)$$

**Lemma 14.** When  $q > p - 1$ , we have  $n \lesssim \frac{5L}{\log(L)^2} - \log(L)^q$  satisfies (20).

*Proof.* If the condition above holds, we have

$$n^{2 + \frac{\log(L)^p}{L}} \leq \left( \frac{5L}{\log(L)^2} - \log(L)^q \right)^{2 + \frac{\log(L)^p}{L}},$$

which is

$$\begin{aligned} n^{1 + \frac{\log(L)^p}{2L}} &\leq \left( \frac{5L}{\log(L)^2} - \log(L)^q \right) \left( \frac{5L}{\log(L)^2} - \log(L)^q \right)^{\frac{\log(L)^p}{2L}} \\ &\leq \left( \frac{5L}{\log(L)^2} - \log(L)^q \right) \left( 1 + \frac{\log(L)^p \log \left( \frac{5L}{\log(L)^2} \right)}{2L} \right) \\ &= \frac{5L}{\log(L)^2} - \log(L)^q + \frac{5}{2} \log(L)^{p-2} \log \left( \frac{5L}{\log(L)^2} \right) - \frac{1}{2L} \log(L)^{p+q} \log \left( \frac{5L}{\log(L)^2} \right), \end{aligned}$$

where  $\left( \frac{5L}{\log(L)^2} - \log(L)^q \right)^{\frac{\log(L)^p}{2L}} \rightarrow 1$  as  $L \rightarrow \infty$ .

Thus we have  $q > p - 1$ . □

Just pick  $q = p$ . Then we have  $n^{1 + \frac{\log(L)^p}{2L}} \lesssim \frac{5L}{\log(L)^2}$  and  $n \lesssim \frac{5L}{\log(L)^2} - \log(L)^p$ .

**Lemma 15.** When  $L$  is large enough, we have

$$\cos \left( \pi \left( 1 - \left( \frac{n}{n+1} \right)^{3 + \frac{\log(L)^2}{L}} \right) \right) \leq K_n \leq \cos \left( \pi \left( 1 - \left( \frac{n + \log(L)^p}{n + \log(L)^p + 1} \right)^{3 - \frac{\log(L)^2}{L}} \right) \right).$$

*Proof.* Let  $F(n) = \cos \left( \pi \left( 1 - \left( \frac{n + \log(L)^p}{n + \log(L)^p + 1} \right)^{3 - \frac{\log(L)^p}{L}} \right) \right)$ .

For the right hand side, when  $n \gtrsim \frac{5L}{\log(L)^2} - \log(L)^p$ , we have, by series expansion,  $F(n+1) \geq \hat{\sigma}(F(n))$ . Also, when  $n \sim aL$ , where  $0 < a \leq 1$ , we have

$$F(n+1) - \hat{\sigma}(F(n)) = \mathcal{O} \left( \frac{3(2\pi^2 a \log^{10}(L) + \pi^2 \log^8(L))}{2L^4 (a \log^2(L) + 5)^4} \right) > 0.$$

Then for  $\frac{5L}{\log(L)^2} - \log(L)^p \lesssim n \lesssim L$ , we have  $F(n+1) \geq \hat{\sigma}(F(n))$  and thus  $K_n \leq F(n)$ .

When  $n \lesssim \frac{5L}{\log(L)^2} - \log(L)^p$ , we have  $F(n+1) \leq \hat{\sigma}(F(n))$ . Hence  $K_n \leq F(n)$ .

For the left hand side,

$$\begin{aligned} \cos \left( \pi \left( 1 - \left( \frac{n+1}{n+2} \right)^{3 + \frac{\log(L)^2}{L}} \right) \right) - \hat{\sigma} \left( \cos \left( \pi \left( 1 - \left( \frac{n}{n+1} \right)^{3 + \frac{\log(L)^2}{L}} \right) \right) \right) \\ \sim -\frac{27\pi^2}{2n^4} - \frac{3\pi^2 \log(L)^2}{n^3 L}, \forall n = 1, \dots, L. \end{aligned}$$

Hence we have the left hand side. □

From Lemma 15, by series expansion, we have

$$|1 - K_n| \leq \frac{\left(3\pi + \frac{\pi \log(L)^2}{L}\right)^2}{2n^2} \sim \frac{9\pi^2}{2n^2},$$

when  $L$  is large.

Moreover, we can get

$$\left(\frac{n}{n+1}\right)^{3+\frac{\log(L)^2}{L}} \leq \Gamma_{\sigma'}(K_n) \leq \left(\frac{n + \log(L)^p}{n + \log(L)^p + 1}\right)^{3-\frac{\log(L)^2}{L}}.$$

Then

$$\left(\frac{\ell-1}{L}\right)^{3+\frac{\log(L)^2}{L}} \leq \prod_{i=\ell}^L \Gamma_{\sigma'}(K_{i-1}) \leq \left(\frac{\ell + \log(L)^p - 1}{L + \log(L)^p}\right)^{3-\frac{\log(L)^2}{L}}.$$

Let  $N = \log(L)^p$ . For the right hand side, if we sum over  $\ell$ , we have

$$\begin{aligned} \frac{1}{L} \sum_{\ell=1}^L \left(\frac{\ell + N - 1}{L + N}\right)^{3-\frac{\log(L)^2}{L}} &\leq \frac{1}{L} \int_1^{L+1} \left(\frac{x + N - 1}{L + N}\right)^{3-\frac{\log(L)^2}{L}} dx \\ &= \frac{\left((L + N)^{4-\frac{\log(L)^2}{L}} - (N)^{4-\frac{\log(L)^2}{L}}\right)}{L(L + N)^{3-\frac{\log(L)^2}{L}} \left(4 - \frac{\log(L)^2}{L}\right)}. \end{aligned}$$

Taking the limit of both sides, we have

$$\lim_{L \rightarrow \infty} \frac{1}{L} \sum_{\ell=1}^L \left(\frac{\ell + N - 1}{L + N}\right)^{3-\frac{\log(L)^2}{L}} \leq \frac{1}{4}.$$

Similarly, by

$$\frac{1}{L} \sum_{i=1}^L \left(\frac{\ell-1}{L}\right)^{3+\frac{\log(L)^2}{L}} \geq \frac{1}{L} \int_1^L \left(\frac{x-1}{L}\right)^{3+\frac{\log(L)^2}{L}} dx = \frac{(L-1)^{4+\frac{\log(L)^2}{L}}}{\left(4 + \frac{\log(L)^2}{L}\right) L^{4+\frac{\log(L)^2}{L}}},$$

we have

$$\lim_{L \rightarrow \infty} \frac{1}{L} \sum_{i=1}^L \left(\frac{\ell-1}{L}\right)^{3+\frac{\log(L)^2}{L}} \geq \frac{1}{4}.$$

Hence,

$$\begin{aligned} \lim_{L \rightarrow \infty} \frac{1}{L} \sum_{\ell=1}^L \left(\frac{\ell + N - 1}{L + N}\right)^{3-\frac{\log(L)^2}{L}} &= \lim_{L \rightarrow \infty} \frac{1}{L} \sum_{\ell=1}^L \left(\frac{\ell-1}{L}\right)^{3+\frac{\log(L)^2}{L}} \\ &= \lim_{L \rightarrow \infty} \frac{1}{L} \sum_{\ell=1}^L \prod_{i=\ell}^L \Gamma_{\sigma'}(K_{i-1}) = \frac{1}{4}. \end{aligned}$$

Recall from previous discussion,  $K_\ell = 1 - \mathcal{O}\left(\frac{1}{\ell^2}\right)$ . Therefore,

$$\lim_{L \rightarrow \infty} \frac{1}{L} \sum_{\ell=1}^L K_{\ell-1} \prod_{i=\ell}^L \Gamma_{\sigma'}(K_{i-1}) = \frac{1}{4}.$$

Also, when  $L$  is large, we have

$$\frac{\left((L + N)^{4-\frac{\log(L)^2}{L}} - (N)^{4-\frac{\log(L)^2}{L}}\right)}{L(L + N)^{3-\frac{\log(L)^2}{L}} \left(4 - \frac{\log(L)^2}{L}\right)} > \frac{1}{4} > \frac{(L-1)^{4+\frac{\log(L)^2}{L}}}{\left(4 + \frac{\log(L)^2}{L}\right) L^{4+\frac{\log(L)^2}{L}}}.$$

Hence we can estimate the convergence rate of the normalized kernel

$$\left| \frac{1}{L} \sum_{\ell=1}^L K_{\ell-1} \prod_{i=\ell}^L \Gamma_{\sigma'}(K_{i-1}) - \frac{1}{4} \right| = \left| \frac{1}{L} \sum_{\ell=1}^L \left( K_{\ell-1} \left( \prod_{i=\ell}^L \Gamma_{\sigma'}(K_{i-1}) - \frac{1}{4} \right) + \frac{1}{4} (K_{\ell-1} - 1) \right) \right|$$

$$\begin{aligned}
&\leq \left| \frac{1}{L} \sum_{\ell=1}^L \prod_{i=\ell}^L \Gamma_{\sigma'}(K_{i-1}) - \frac{1}{4} \right| + \frac{1}{4} \left| \frac{1}{L} \sum_{\ell=1}^L (K_{\ell-1} - 1) \right| \\
&\leq \left| \frac{\left( (L+N)^{4-\frac{\log(L)^2}{L}} - (N)^{4-\frac{\log(L)^2}{L}} \right)}{L(L+N)^{3-\frac{\log(L)^2}{L}} \left( 4 - \frac{\log(L)^2}{L} \right)} - \frac{(L-1)^{4+\frac{\log(L)^2}{L}}}{\left( 4 + \frac{\log(L)^2}{L} \right) L^{4+\frac{\log(L)^2}{L}}} \right| \\
&\quad + \frac{1}{4} \left| \frac{1}{L} \sum_{i=1}^L (K_{\ell-1} - 1) \right| \\
&\lesssim \frac{4 \log(L)^p + \log(L)^2}{16L} = \mathcal{O} \left( \frac{\text{poly log}(L)}{L} \right)
\end{aligned}$$

□

## E Proof of Theorem 6

*Proof.* We denote  $K_{\ell,L}$  to be the  $\ell$ -th layer of  $K$  when the depth is  $L$ , which is originally denoted by  $K_\ell$ .

Let  $S_{\ell,L} = \frac{K_{\ell,L}}{(1+\alpha^2)^\ell} = \frac{K_{\ell,L}}{(1+1/L^2)^\ell}$  and  $S_0 = K_0$ , then  $\Gamma_\sigma(K_{\ell,L}) = (1+\alpha^2)^\ell \hat{\sigma}(S_{\ell,L})$  and  $\Gamma_{\sigma'}(K_{\ell,L}) = \hat{\sigma}'(S_{\ell,L})$ . Hence we can rewrite the recursion to be

$$S_{\ell,L} = \frac{S_{\ell-1,L} + \alpha^2 \hat{\sigma}(S_{\ell-1,L})}{(1+\alpha^2)} \geq S_{\ell-1,L}. \quad (21)$$

Moreover, since  $S_{\ell,L} - S_{\ell-1,L} = \frac{\alpha^2}{1+\alpha^2} (\hat{\sigma}(S_{\ell-1,L}) - S_{\ell-1,L})$  and  $(\hat{\sigma}(S_{\ell-1,L}) - S_{\ell-1,L})$  is decreasing, we can have

$$S_{\ell,L} \leq S_0 + \frac{(\hat{\sigma}(S_0) - S_0)\ell}{L^2}.$$

Denote  $P_{\ell+1,L} = B_{\ell+1,L} (1+\alpha^2)^{-(L-\ell)} = \prod_{i=\ell}^{L-1} \frac{1+\alpha^2 \hat{\sigma}'(S_{i,L})}{1+\alpha^2}$ . Since

$$1 - \frac{1+\alpha^2 \hat{\sigma}'(S_{i,L})}{1+\alpha^2} = \frac{\alpha^2(1 - \hat{\sigma}'(S_{i,L}))}{1+\alpha^2} = \frac{1 - \hat{\sigma}'(S_{i,L})}{L^2 + 1},$$

we have

$$1 - P_{\ell+1,L} = 1 - \prod_{i=\ell}^{L-1} \left( 1 - \frac{1 - \hat{\sigma}'(S_{i,L})}{L^2 + 1} \right) \leq \sum_{i=\ell}^{L-1} \frac{1 - \hat{\sigma}'(S_{i,L})}{L^2 + 1} = \frac{L - \ell - \sum_{i=\ell}^{L-1} \hat{\sigma}'(S_{i,L})}{L^2 + 1},$$

where  $\ell = 1, \dots, L-1$ . For  $P_{L+1,L}$ , we have  $1 - P_{L+1,L} = 0$ .

Then we can rewrite the normalized kernel to be

$$\bar{\Omega}_L = \frac{1}{2L} \sum_{\ell=1}^L P_{\ell+1,L} (\hat{\sigma}(S_{\ell-1,L}) + S_{\ell-1,L} \hat{\sigma}'(S_{\ell-1,L})).$$

Hence we have the bound for each layer

$$\begin{aligned}
&\left| P_{\ell+1,L} (\hat{\sigma}(S_{\ell-1,L}) + S_{\ell-1,L} \hat{\sigma}'(S_{\ell-1,L})) - (\hat{\sigma}(S_0) + S_0 \hat{\sigma}'(S_0)) \right| \\
&\leq \left| P_{\ell+1,L} \right| \cdot \left| (\hat{\sigma}(S_{\ell-1,L}) + S_{\ell-1,L} \hat{\sigma}'(S_{\ell-1,L})) - (\hat{\sigma}(S_0) + S_0 \hat{\sigma}'(S_0)) \right| + \left| \hat{\sigma}(S_0) + S_0 \hat{\sigma}'(S_0) \right| \cdot \left| 1 - P_{\ell+1,L} \right| \\
&\leq \left| \hat{\sigma}'(S_{\ell-1,L})(S_{\ell-1,L} - S_0) \right| + \left| \hat{\sigma}'(S_{\ell-1,L}) S_{\ell-1,L} - \hat{\sigma}'(S_0) S_0 \right| + \left| \hat{\sigma}(S_0) + S_0 \hat{\sigma}'(S_0) \right| \cdot \left| 1 - P_{\ell+1,L} \right| \\
&= 2 \left| \hat{\sigma}'(S_{\ell-1,L})(S_{\ell-1,L} - S_0) \right| + \left| S_0 (\hat{\sigma}'(S_{\ell-1,L}) - \hat{\sigma}'(S_0)) \right| + \left| \hat{\sigma}(S_0) + S_0 \hat{\sigma}'(S_0) \right| \cdot \left| 1 - P_{\ell+1,L} \right| \\
&\leq \frac{2 \hat{\sigma}'(S_{\ell-1,L}) (\hat{\sigma}(S_0) - S_0) \ell}{L^2} + \frac{|S_0| (\hat{\sigma}(S_0) - S_0) (\ell - 1)}{\pi L^2 \sqrt{1 - S_{\ell-1,L}^2}} + \left| \hat{\sigma}(S_0) + S_0 \hat{\sigma}'(S_0) \right| \frac{L - \ell - \sum_{i=\ell}^{L-1} \hat{\sigma}'(S_{i,L})}{L^2 + 1} \\
&\leq \frac{2 \hat{\sigma}'(S_{\ell-1,L}) (\hat{\sigma}(S_0) - S_0) \ell}{L^2} + \frac{|S_0| (\hat{\sigma}(S_0) - S_0) (\ell - 1)}{\pi L^2 \sqrt{1 - S_{\ell-1,L}^2}} + \left| \hat{\sigma}(S_0) + S_0 \hat{\sigma}'(S_0) \right| \frac{L - \ell - (L - \ell) \hat{\sigma}'(S_0)}{L^2 + 1}.
\end{aligned}$$

Therefore we have the bound for the normalized kernel

$$\begin{aligned}
& \left| \overline{\Omega}_L - \frac{1}{2}(\hat{\sigma}(S_0) + S_0 \widehat{\sigma}'(S_0)) \right| \\
&= \left| \frac{1}{2L} \sum_{\ell=1}^L \left( P_{\ell+1,L}(\hat{\sigma}(S_{\ell-1,L}) + S_{\ell-1,L} \widehat{\sigma}'(S_{\ell-1,L})) \right) - \frac{1}{2}(\hat{\sigma}(S_0) + S_0 \widehat{\sigma}'(S_0)) \right| \\
&\leq \frac{1}{2L} \sum_{\ell=1}^L \left( \frac{2\widehat{\sigma}'(S_{\ell-1,L})(\hat{\sigma}(S_0) - S_0)\ell}{L^2} + \frac{|S_0|(\hat{\sigma}(S_0) - S_0)(\ell-1)}{\pi L^2 \sqrt{1 - S_{\ell-1,L}^2}} \right) \\
&\quad + \frac{1}{2L} \sum_{\ell=1}^{L-1} \left( \left| \hat{\sigma}(S_0) + S_0 \widehat{\sigma}'(S_0) \right| \frac{L - \ell - (L - \ell) \widehat{\sigma}'(S_0)}{L^2 + 1} \right) \\
&\leq \frac{1}{2L} \left( \frac{L+1}{L} (\hat{\sigma}(S_0) - S_0) + \frac{|S_0|(\hat{\sigma}(S_0) - S_0)L(L-1)}{2\pi L^2 C} + \left| \hat{\sigma}(S_0) + S_0 \widehat{\sigma}'(S_0) \right| \frac{\frac{L(L-1)}{2}(1 - \widehat{\sigma}'(S_0))}{L^2 + 1} \right) \\
&\sim \left( \frac{(\hat{\sigma}(S_0) - S_0)}{2} \left( 1 + \frac{|S_0|}{2\pi C} \right) + \frac{1}{2} \left| \hat{\sigma}(S_0) + S_0 \widehat{\sigma}'(S_0) \right| (1 - \widehat{\sigma}'(S_0)) \right) \frac{1}{L}
\end{aligned}$$

where  $C = C(\delta) = \sqrt{1 - (1 - \delta)^2}$  and  $S_0 = K_0$ . □
